# Supplementary material for: Mechanisms of action and resistance in histone methylation-targeted therapy
Source: PubMed Central journal article supplement (PMC10917674; doi:10.1038/s41586-024-07103-x), 2024-02-21

**Supplementary information**

---

**Mechanisms of action and resistance in histone methylation-targeted therapy**

---

In the format provided by the authors and unedited

Raw data for Fig 5e  
Dotted areas denote blots' images included in the manuscript

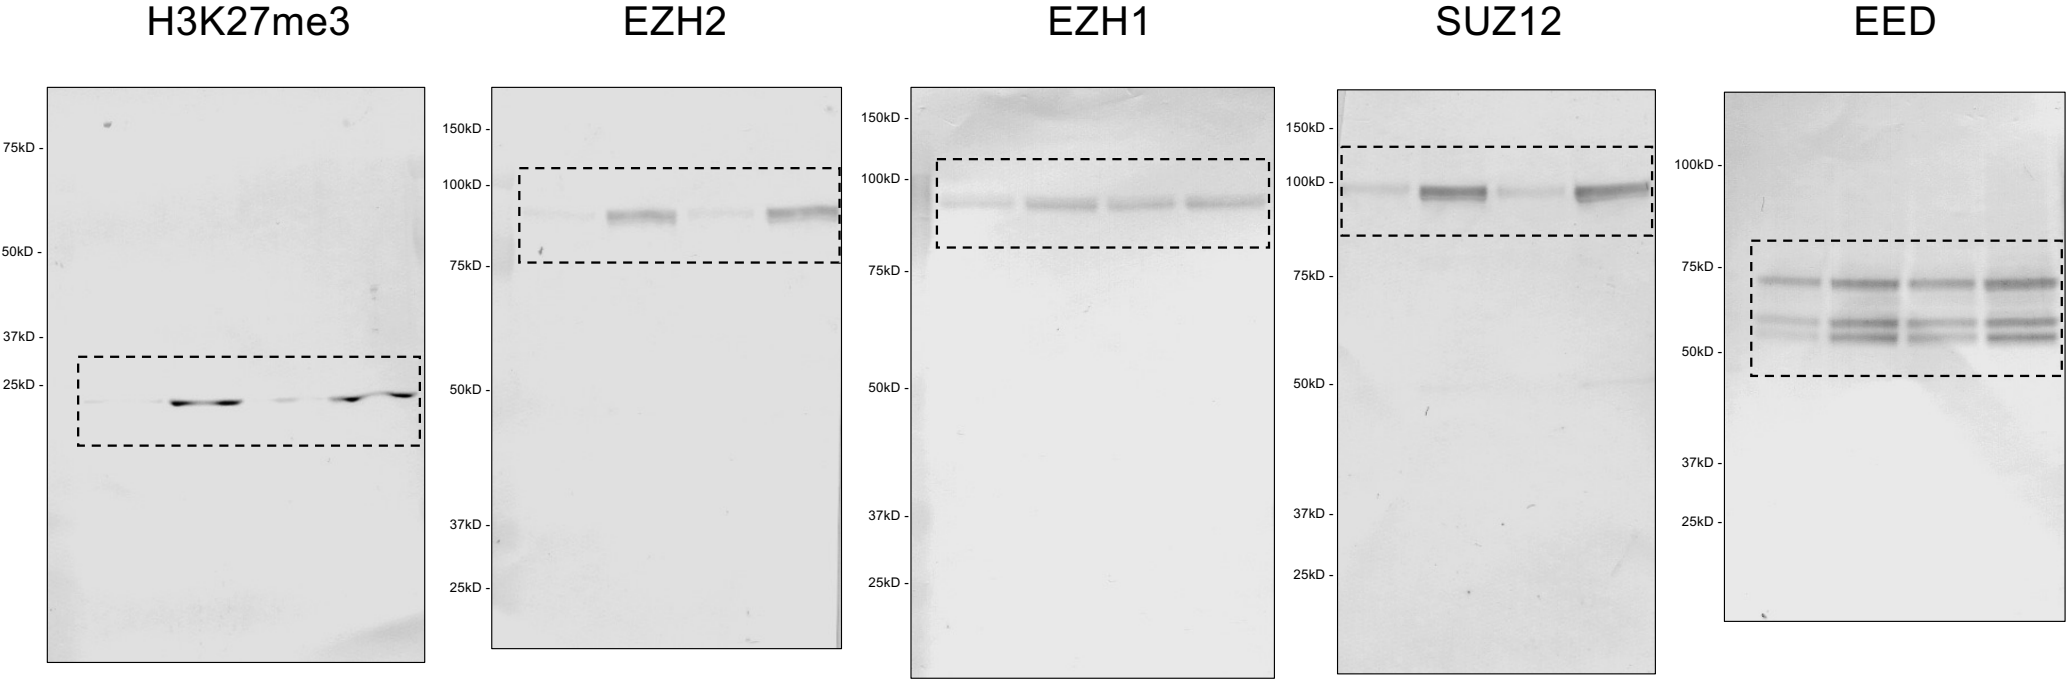

Raw data for Fig 5e  
Dotted areas denote blots' images included in the manuscript

c-Jun

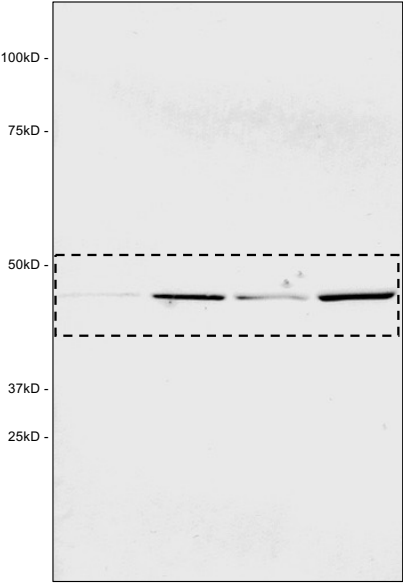

eIF3D

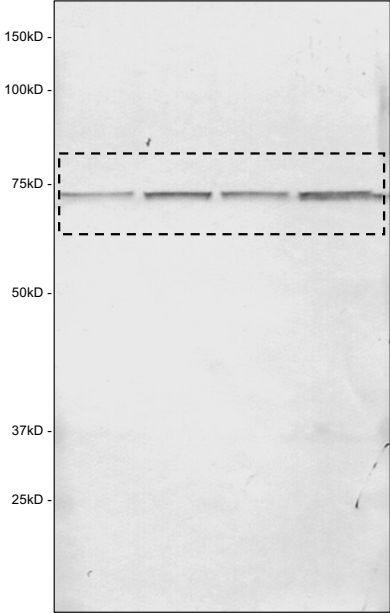

COX4

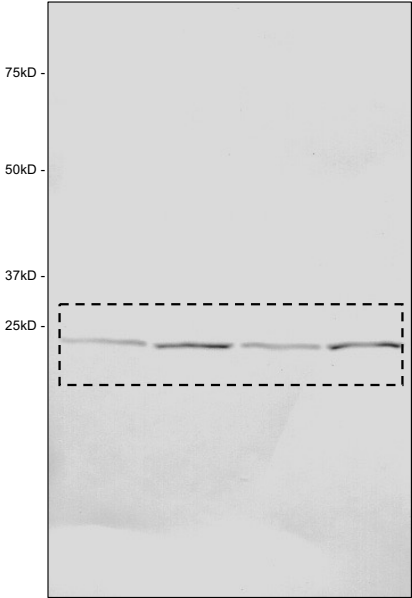

TFAM

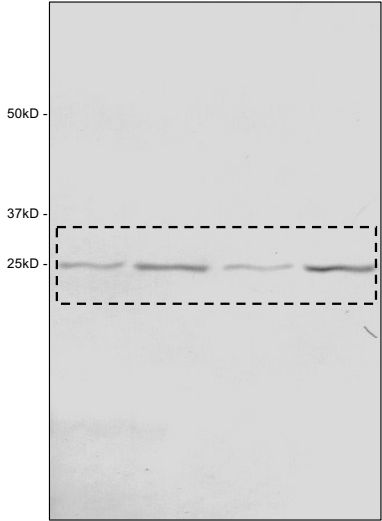

Actin

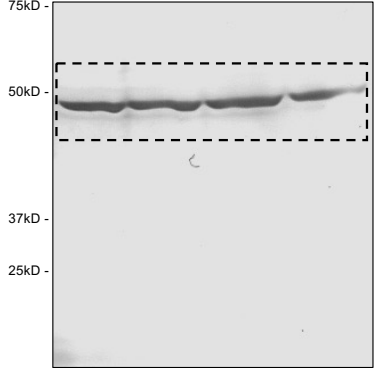

Raw data for Fig 5g  
Dotted areas denote blots' images included in the manuscript

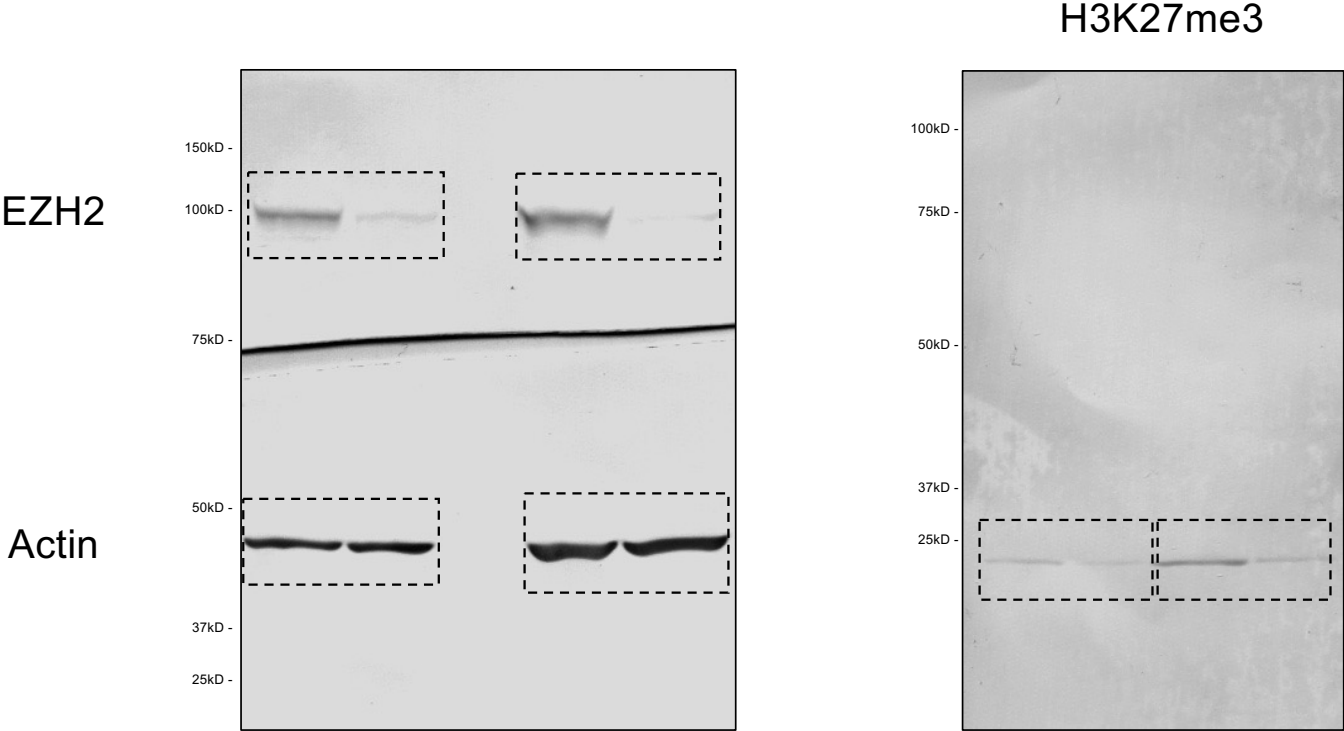

Raw data for Extended Data Fig 5e

Dotted areas denote blots' images included in the manuscript

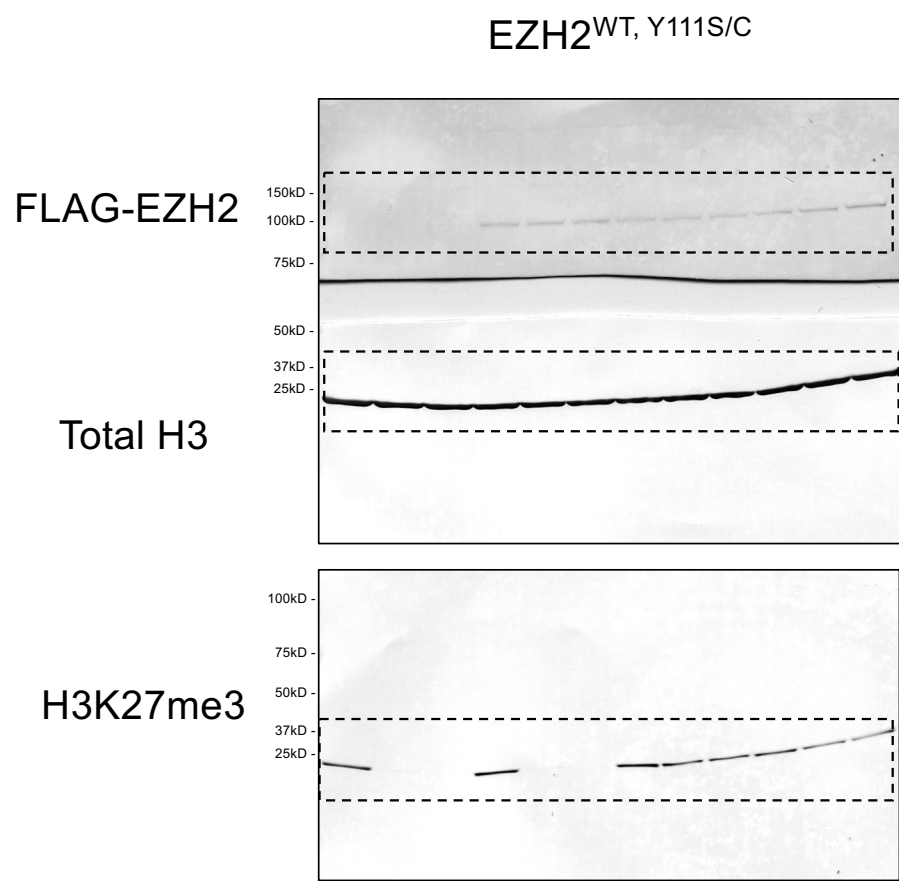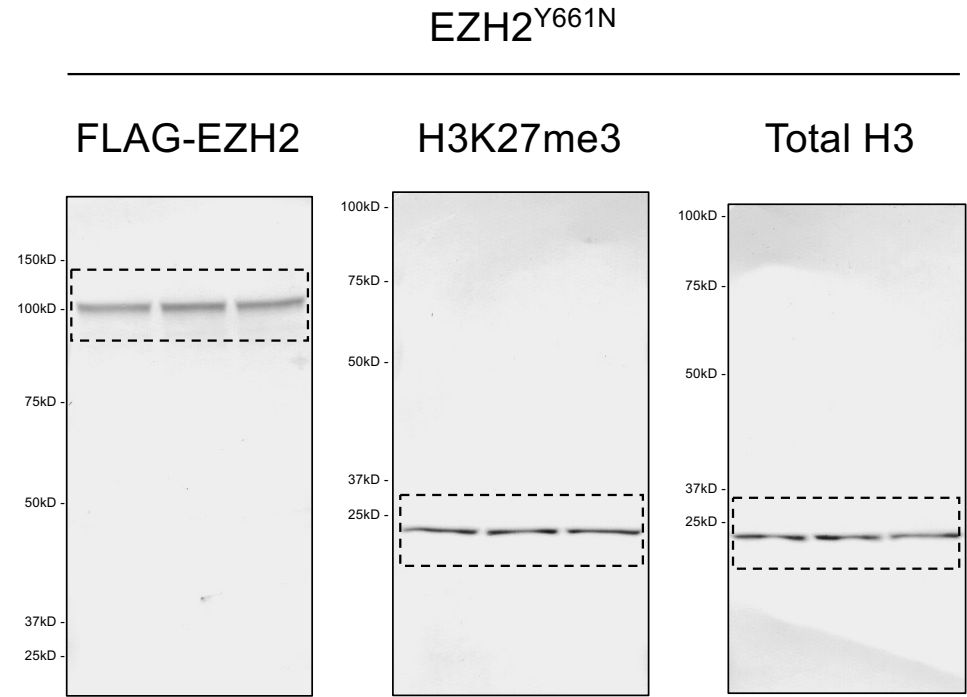

Raw data for Extended Data Fig 5e  
Dotted areas denote blots' images included in the manuscript

EED<sup>WT</sup> / H213R

FLAG-EED

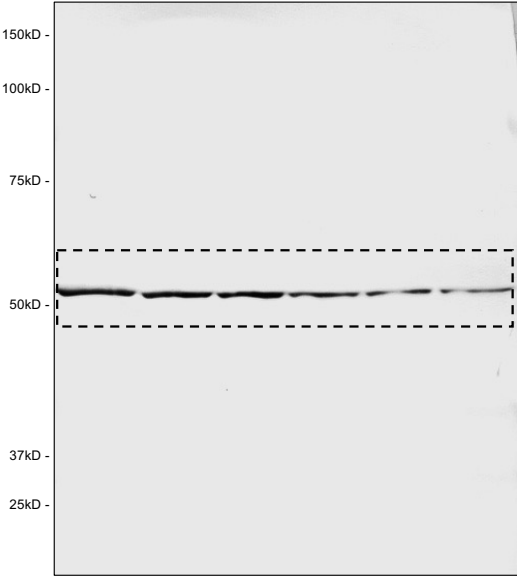

H3K27me3

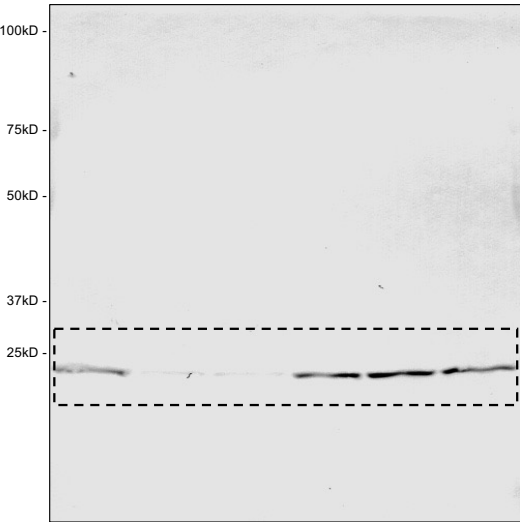

Total H3

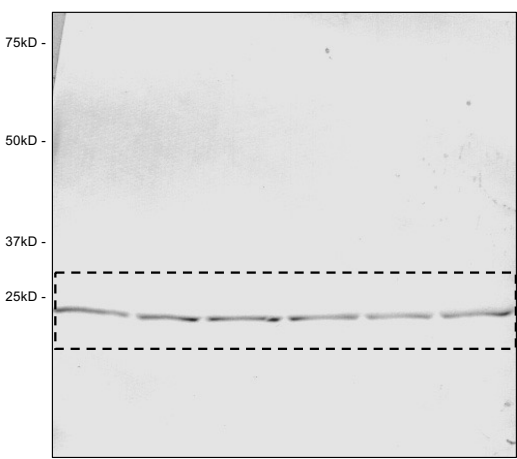

Raw data for Extended Data Fig 8h

Dotted areas denote blots' images included in the manuscript

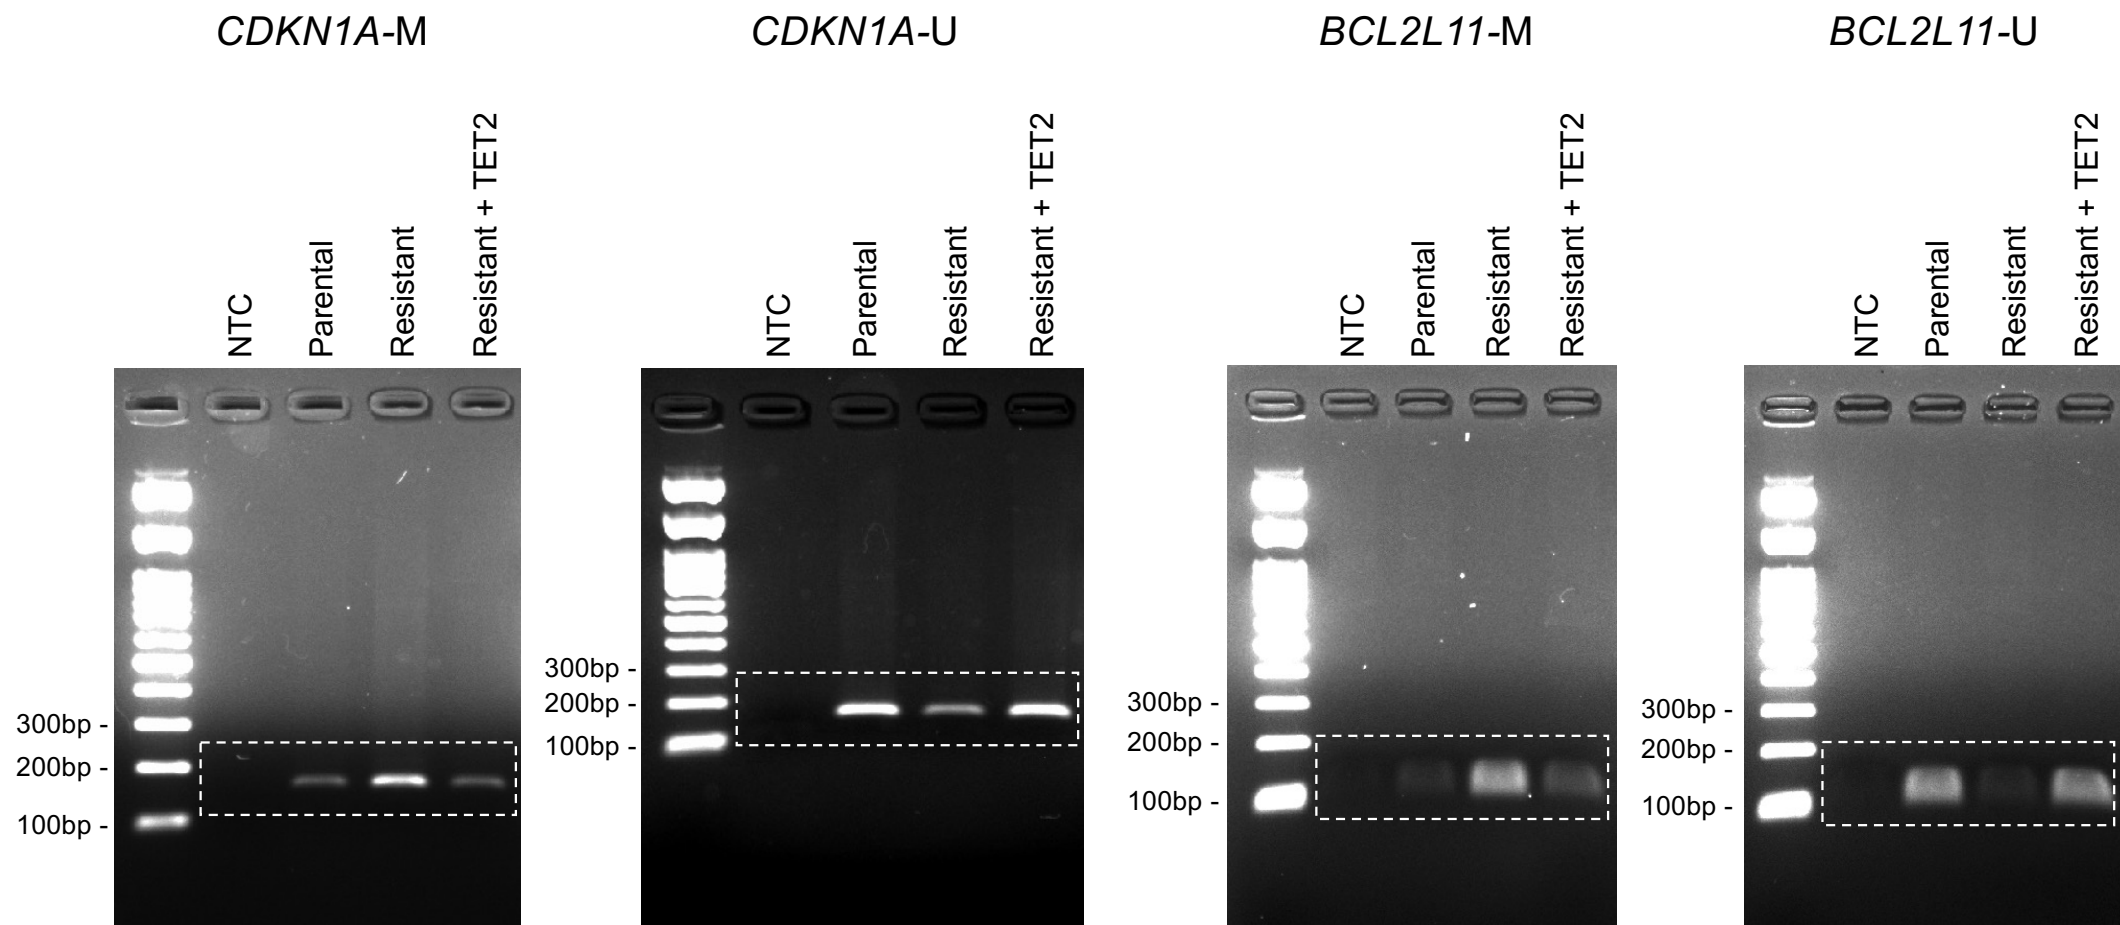

Raw data for Extended Data Fig 8k  
Dotted areas denote blots' images included in the manuscript

shTET2#1 clone

H3K27me3

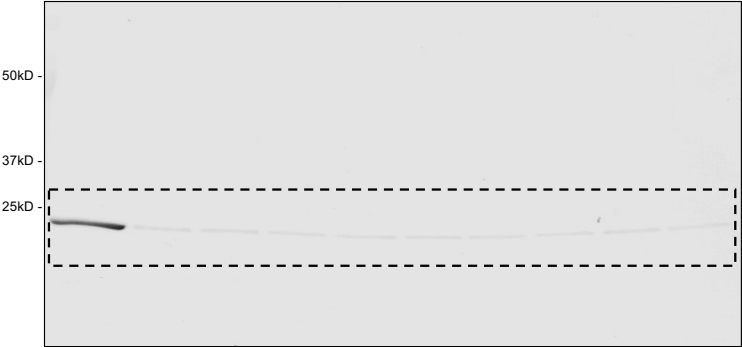

Total H3

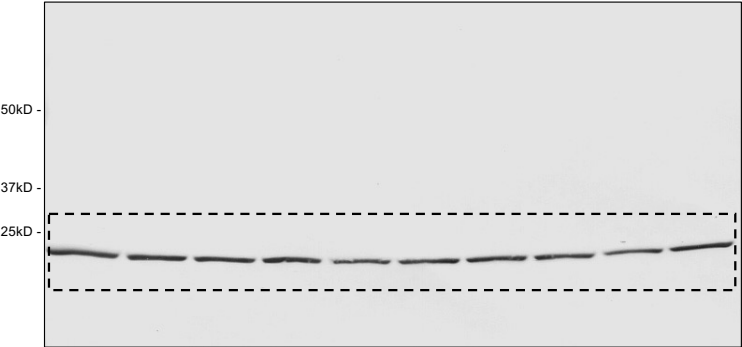

shTET2#2 clone

H3K27me3

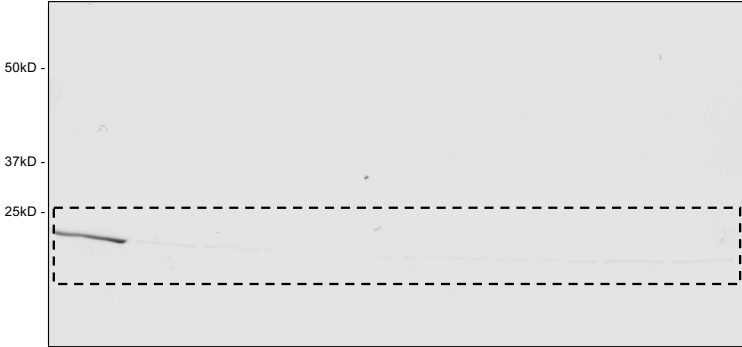

Total H3

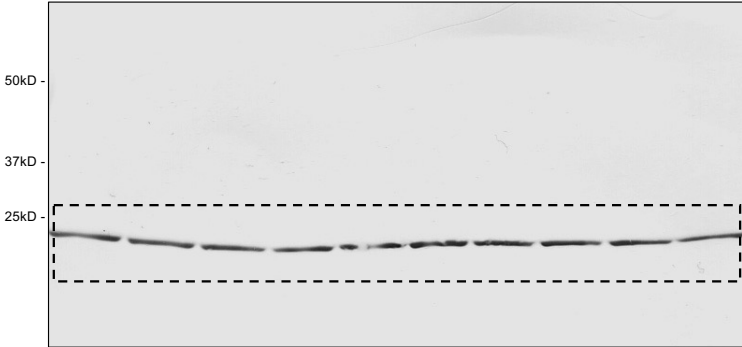



Raw data for Extended Data Fig 8m

Dotted areas denote blots' images included in the manuscript

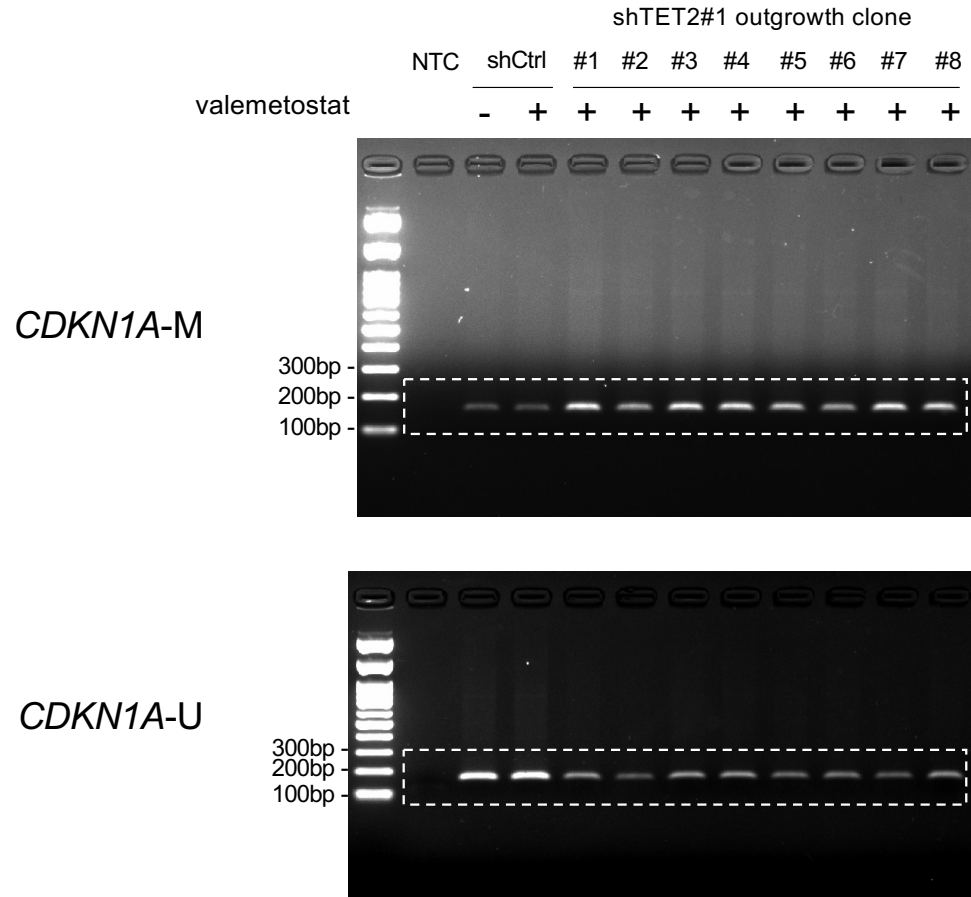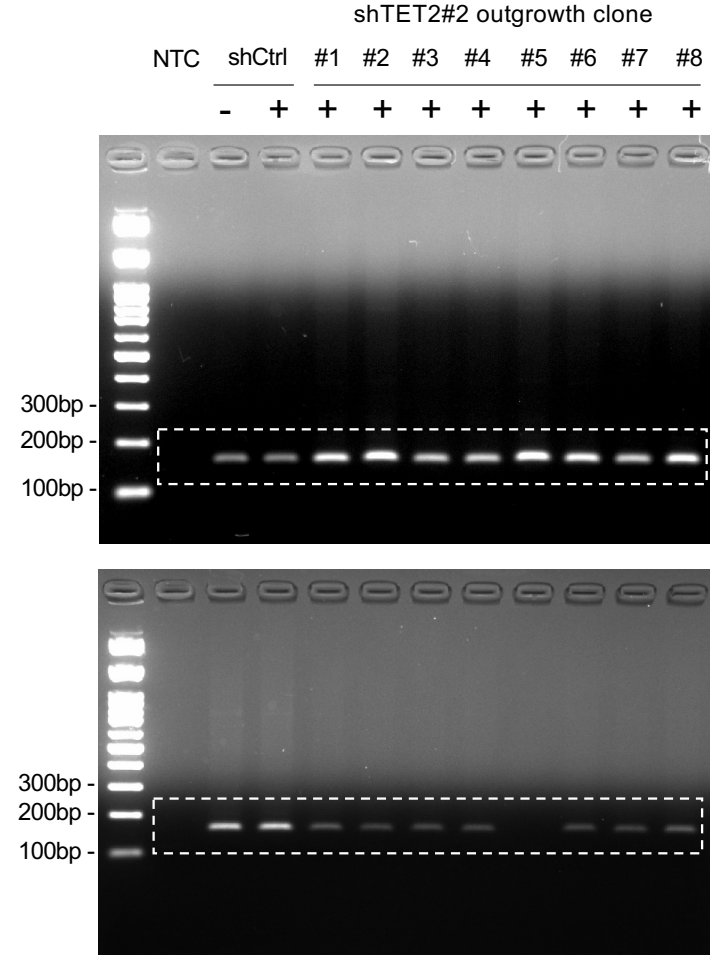

Raw data for Extended Data Fig 8m

Dotted areas denote blots' images included in the manuscript

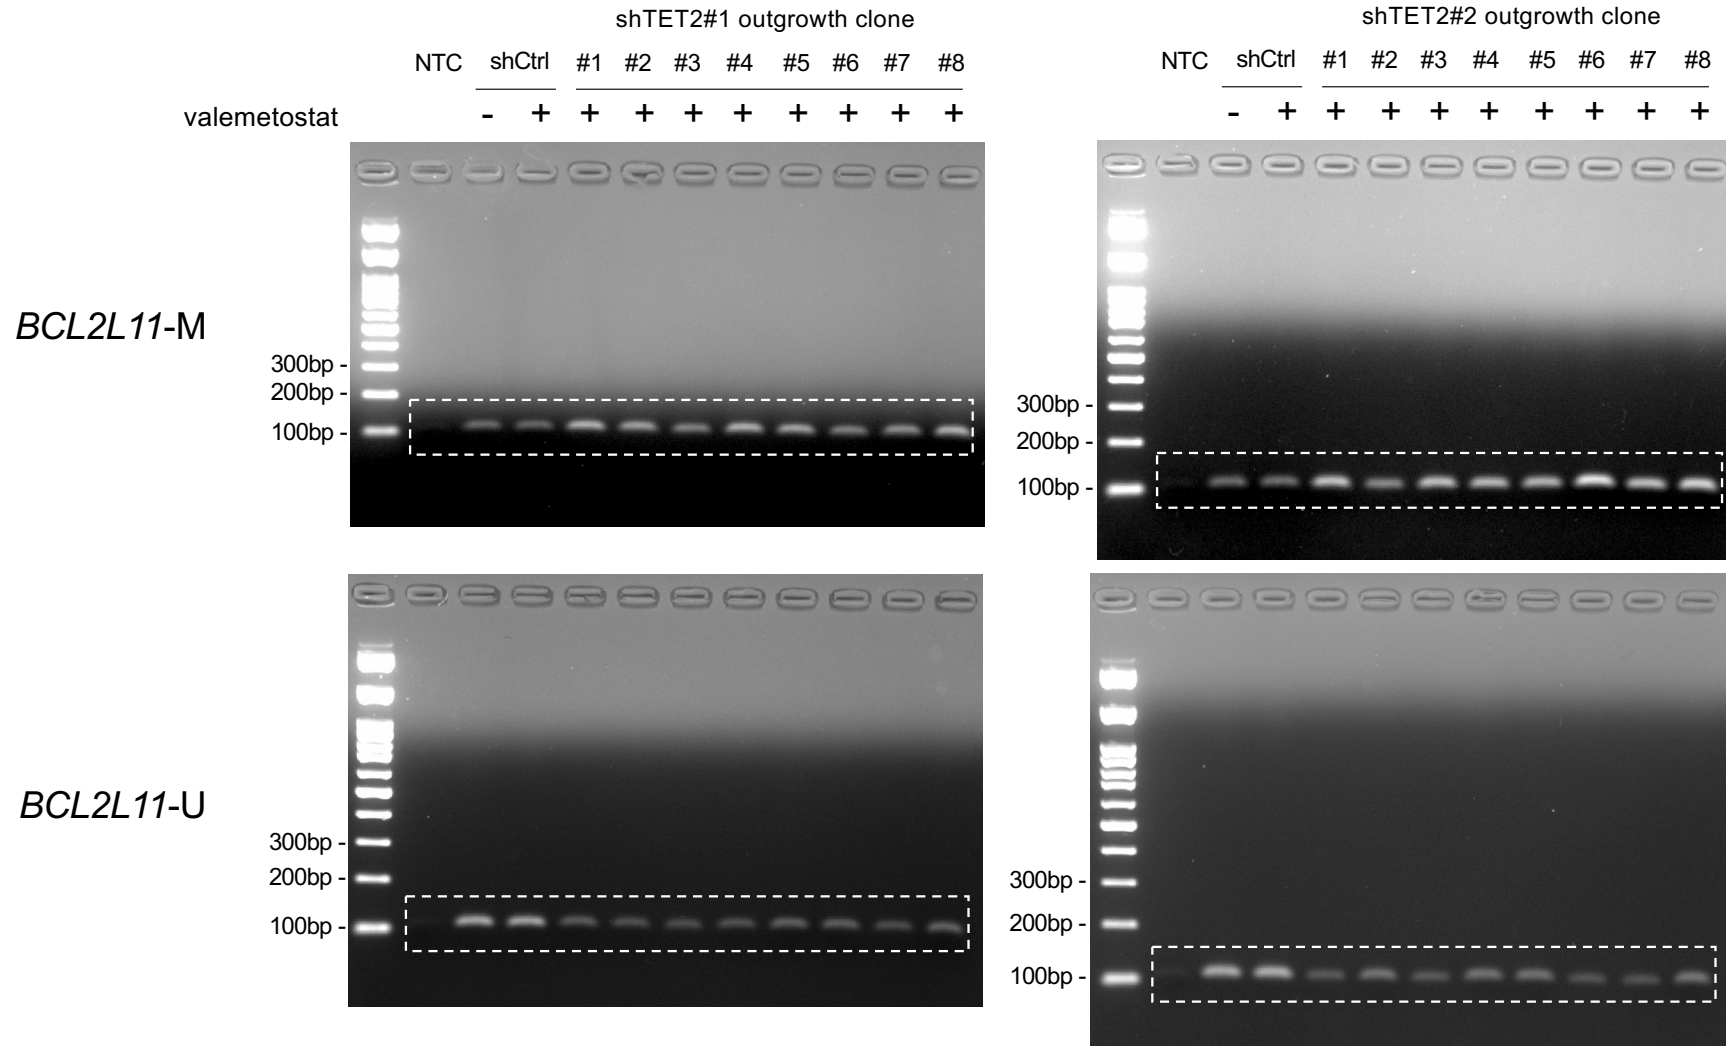

Raw data for Extended Data Fig 9e

Dotted areas denote blots' images included in the manuscript

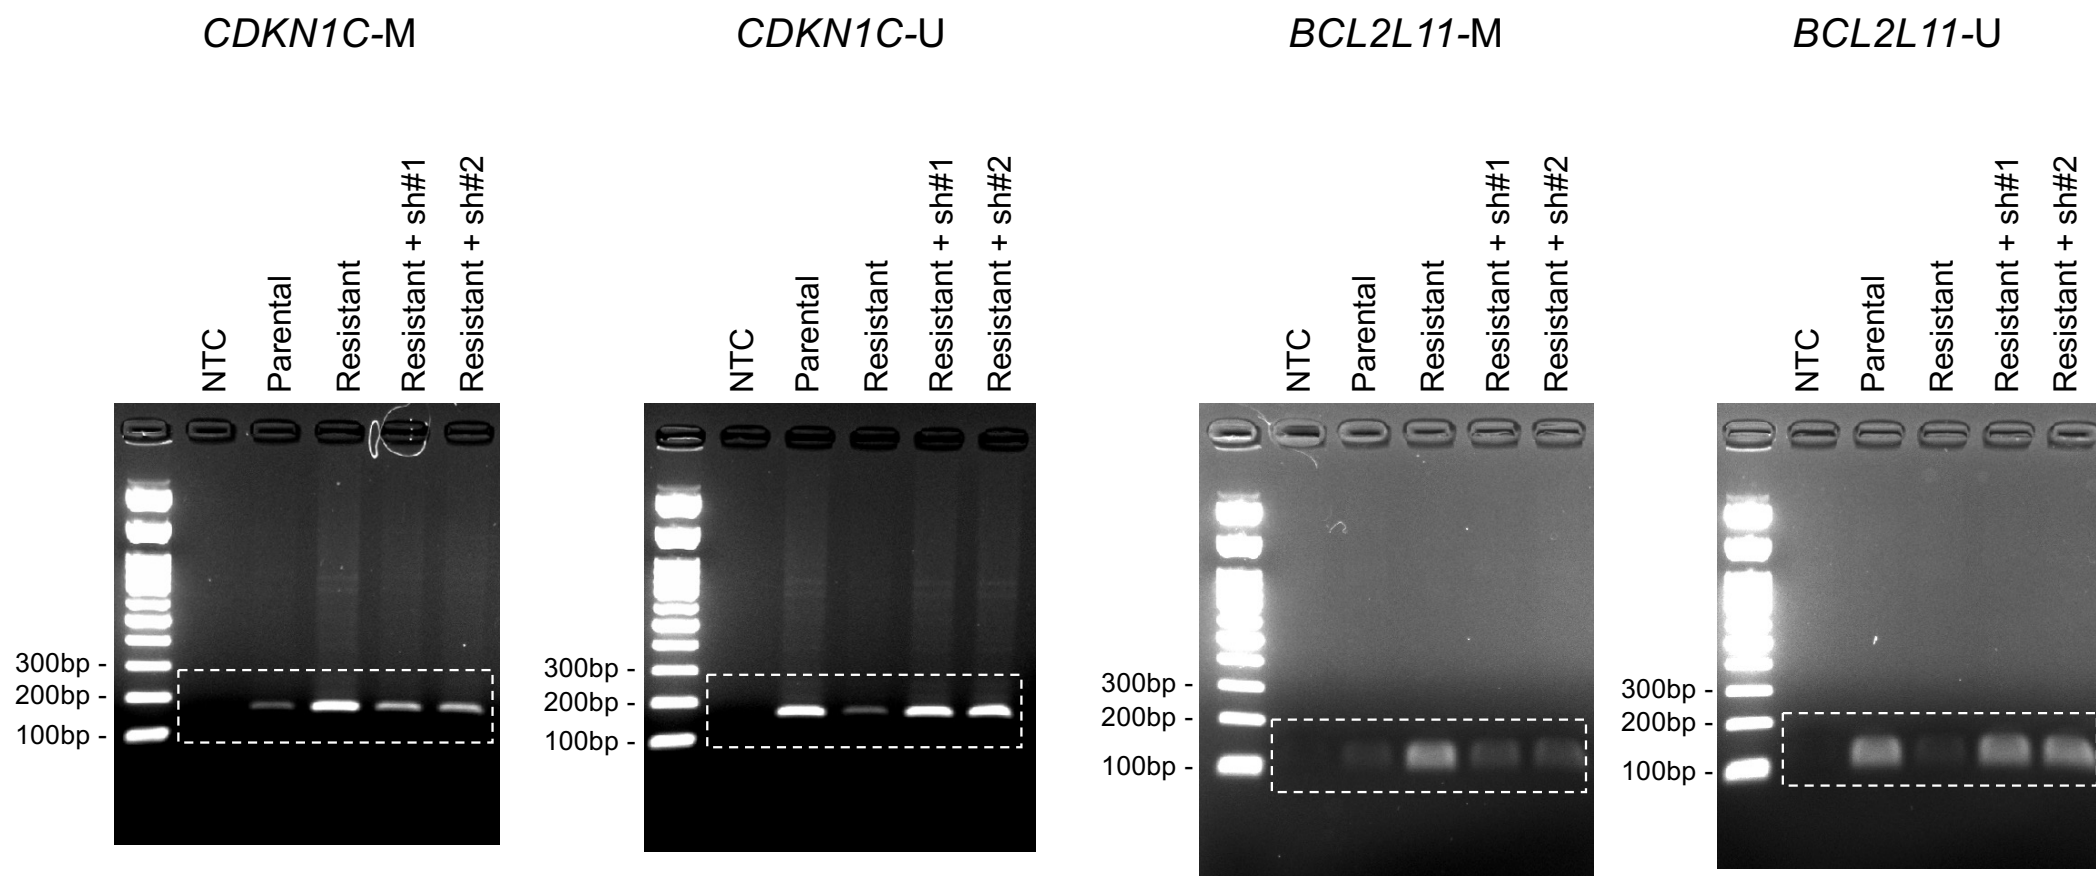

Raw data for Extended Data Fig 9f  
Dotted areas denote blots' images included in the manuscript

DNMT3A

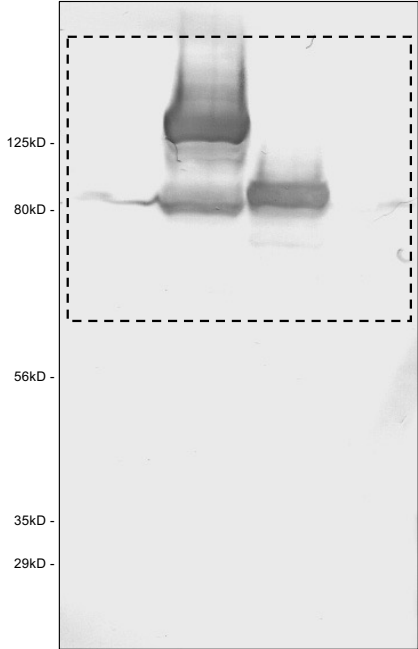

DNMT3B / Actin

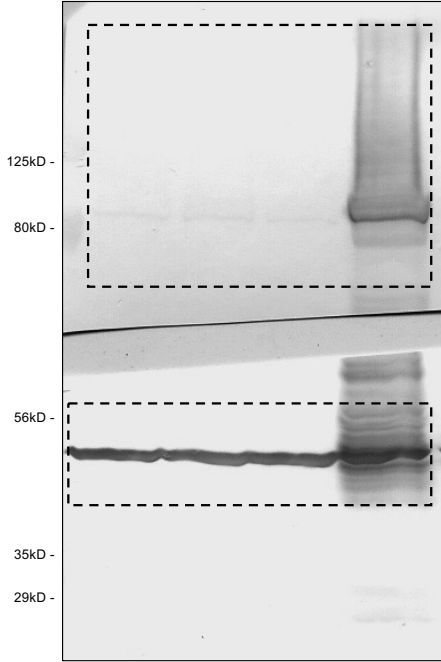

Raw data for Extended Data Fig 10I  
Dotted areas denote blots' images included in the manuscript

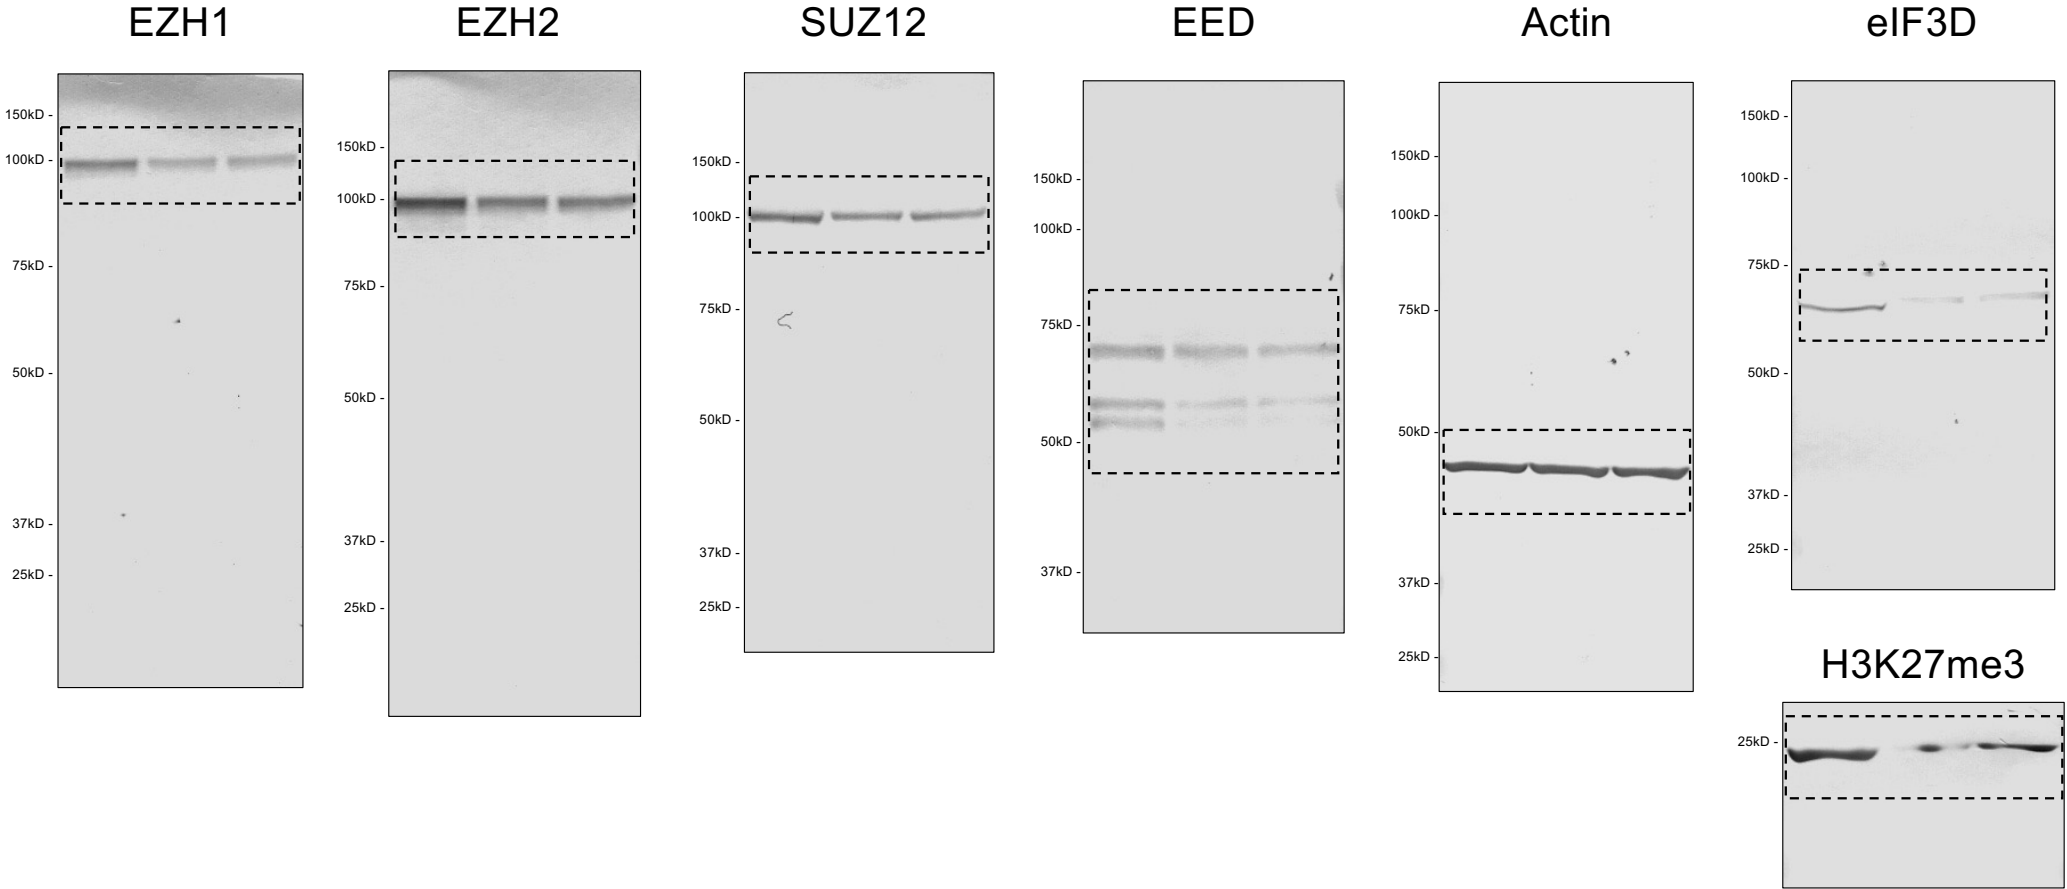

Supplement: 41586_2024_7103_MOESM1_ESM.pdf [file 41586_2024_7103_MOESM1_ESM.pdf]
